# Supplementary material
Source: publisher figshare collection journal article supplement (https://frontiersin.figshare.com/ndownloader/files/27686175)
Supplement: Supplementary file 1 [file 27686175]

SAMPLE_ID	RANK	POPULATION	MIGRATORY	THRACIAN	LEVANTINE	ANATOLIAN	CAUCASIAN	TransformedTHRACIAN	TransformedLEVANTINE	TransformedANATOLIAN	TransformedCAUCASIAN
TK01	1	Kirklareli	0	0,892	0,045	0,0473	0,0157	1,235939942	0,213756132	0,219237699	0,125629847
TK02	2	Kirklareli	0	0,9317	0,0137	0,0397	0,015	1,306383355	0,117315918	0,200591075	0,122782759
TK03	3	Kirklareli	0	0,97	0,009	0,0093	0,0117	1,396713316	0,095011212	0,096586613	0,108378581
TK04	4	Kirklareli	0	0,8946	0,028	0,0297	0,0477	1,240150795	0,168122894	0,173201554	0,220177967
TK05	5	Kirklareli	0	0,8784	0,021	0,071	0,0297	1,214599928	0,145425819	0,269716557	0,173201554
TK06	6	Kirklareli	0	0,885	0,0247	0,0307	0,0597	1,224818739	0,15781662	0,176123284	0,246834708
TK07	7	Kirklareli	0	0,9423	0,0157	0,019	0,023	1,328215957	0,125629847	0,138280757	0,152244963
TK08	8	Kirklareli	1	0,7123	0,016	0,0627	0,209	1,004658182	0,126830868	0,253093065	0,47480517
TK09	9	Kirklareli	0	0,899	0,0177	0,038	0,0453	1,24738279	0,133436978	0,196192083	0,214478562
TK10	10	Kirklareli	0	0,853	0,023	0,0594	0,0647	1,177315244	0,152244963	0,246200864	0,257187893
TK11	11	Kirklareli	0	0,9624	0,008	0,0127	0,017	1,375652948	0,089562407	0,112934187	0,130756325
TK12	12	Kirklareli	0	0,9603	0,009	0,0227	0,008	1,370205252	0,095011212	0,151241111	0,089562407
TK13	13	Kirklareli	0	0,9184	0,0396	0,032	0,01	1,281104259	0,200334842	0,1798535	0,100167421
TK14	14	Kirklareli	0	0,5657	0,2217	0,1183	0,0943	0,85128871	0,49025435	0,35111785	0,312126467
TK15	15	Kirklareli	0	0,9563	0,012	0,017	0,0147	1,360197586	0,109764792	0,130756325	0,121542586
TK16	16	Kirklareli	0	0,9457	0,0173	0,022	0,015	1,335610599	0,131911691	0,14887328	0,122782759
TK17	17	Kirklareli	0	0,9557	0,0137	0,02	0,0107	1,358734842	0,117315918	0,141897055	0,103626168
TK18	18	Kirklareli	0	0,951	0,0183	0,0197	0,011	1,347588058	0,135693524	0,14082166	0,105074125
TK19	19	Kirklareli	0	0,8386	0,0383	0,081	0,042	1,157373439	0,196975136	0,288594352	0,2064014
TK20	20	Kirklareli	0	0,86	0,0127	0,0307	0,0967	1,187299323	0,112934187	0,176123284	0,316209504
TK21	21	Kirklareli	0	0,6724	0,0337	0,2622	0,0317	0,961411019	0,184622638	0,53757517	0,178999286
TK22	22	Kirklareli	0	0,7494	0,145	0,068	0,0377	1,046505008	0,390649059	0,263817741	0,195406055
TK23	23	Kirklareli	0	0,5505	0,133	0,2769	0,0397	0,835984418	0,373301625	0,554140816	0,200591075
TK24	24	Kirklareli	0	0,9317	0,026	0,0173	0,025	1,306383355	0,161952188	0,131911691	0,158780215
TK25	25	Kirklareli	0	0,623	0,1903	0,14	0,0467	0,909673794	0,451409056	0,383497004	0,217820182
TK26	26	Kirklareli	0	0,3751	0,0267	0,3721	0,2261	0,659161313	0,16413736	0,656060591	0,495532011
TK27	27	Kirklareli	0	0,6109	0,1337	0,1807	0,0747	0,897228195	0,374331181	0,439059354	0,276835497
TK28	28	Kirklareli	0	0,7681	0,061	0,0663	0,1046	1,06836254	0,2495643	0,260421501	0,3293407
TK29	29	Kirklareli	0	0,7757	0,0517	0,1027	0,07	1,077418904	0,229382602	0,326223933	0,267763327
TK30	30	Kirklareli	0	0,55	0,1857	0,2313	0,033	0,835481874	0,445522271	0,501722641	0,182673281
TK31	31	Kirklareli	0	0,9456	0,0127	0,015	0,0267	1,335390051	0,112934187	0,122782759	0,16413736
TK32	32	Kirklareli	0	0,7987	0,0267	0,1507	0,024	1,105525691	0,16413736	0,398678672	0,155545801
TK33	33	Kirklareli	0	0,234	0,0713	0,634	0,0607	0,504917761	0,270300044	0,921056408	0,248936829
TK34	34	Kirklareli	0	0,7716	0,1064	0,0947	0,0273	1,072520041	0,332270445	0,312810174	0,165988288
TK35	35	Kirklareli	0	0,703	0,0453	0,2203	0,0313	0,994434568	0,214478562	0,488567278	0,17785423
TK36	36	Kirklareli	0	0,8267	0,0487	0,098	0,0267	1,141431722	0,222512388	0,318402248	0,16413736
TK37	37	Kirklareli	0	0,93	0,0133	0,0277	0,029	1,303033	0,115582807	0,167211275	0,171127881
TK38	38	Kirklareli	0	0,794	0,0927	0,089	0,0243	1,099690163	0,309378547	0,302941114	0,15652291
TE1	39	Edirne+	0	0,7993	0,041	0,11	0,0497	1,106274291	0,203894381	0,338065255	0,224824178
TE2	40	Edirne+	0	0,3293	0,0373	0,5	0,1333	0,61119517	0,194353329	0,785398163	0,373743143
TE3	41	Edirne+	0	0,9603	0,009	0,0187	0,012	1,370205252	0,095011212	0,137177768	0,109764792
TE4	42	Edirne+	0	0,8617	0,036	0,0663	0,036	1,18975525	0,190893927	0,260421501	0,190893927
TE5	43	Edirne+	0	0,3783	0,029	0,5228	0,0699	0,662463293	0,171127881	0,808206072	0,267567297
TT1	44	Edirne+	1	0,4943	0,0377	0,3133	0,1547	0,77969804	0,195406055	0,594062451	0,404238999
TT2	45	Edirne+	0	0,674	0,157	0,056	0,113	0,963116619	0,407409569	0,238909449	0,342831038
TT3	46	Edirne+	0	0,521	0,2447	0,1903	0,044	0,806404342	0,51745693	0,451409056	0,211331302
MD01	47	Duzce+	0	0,1807	0,0227	0,6297	0,167	0,439059354	0,151241111	0,916598606	0,42098137
MD02	48	Duzce+	0	0,0193	0,0872	0,5861	0,3074	0,13937524	0,299765803	0,871929462	0,587685895
MD03	49	Duzce+	0	0,2756	0,046	0,6348	0,0437	0,552687138	0,216155422	0,921886977	0,210598741
MD04	50	Duzce+	0	0,5523	0,233	0,1467	0,068	0,837794006	0,503735888	0,393057302	0,263817741
MD05	51	Duzce+	0	0,025	0,0227	0,8897	0,0627	0,158780215	0,151241111	1,232251956	0,253093065
MD06	52	Duzce+	0	0,0243	0,3027	0,3597	0,3133	0,15652291	0,582581921	0,64318858	0,594062451
MD07	53	Duzce+	0	0,2806	0,0443	0,4945	0,1806	0,558266761	0,212061485	0,779898052	0,438929392
MD08	54	Duzce+	0	0,0407	0,0227	0,9163	0,0203	0,203136584	0,151241111	1,277290892	0,142964577
MD09	55	Duzce+	0	0,0937	0,0607	0,824	0,0217	0,311098465	0,248936829	1,137875955	0,147847238
MD10	56	Duzce+	0	0,094	0,0437	0,7837	0,0787	0,311612833	0,210598741	1,087070629	0,284351657
MBo1	57	Duzce+	0	0,043	0,0523	0,6943	0,2103	0,20888004	0,230733794	0,984954008	0,476401993
MBo2	58	Duzce+	0	0,1097	0,0407	0,8113	0,0383	0,337585566	0,203136584	1,121428585	0,196975136
MBo3	59	Duzce+	0	0,3877	0,0187	0,2103	0,3833	0,672131899	0,137177768	0,476401993	0,667611765
MBo4	60	Duzce+	0	0,0447	0,0267	0,8866	0,042	0,213031405	0,16413736	1,22733405	0,2064014
MZ1	61	Duzce+	0	0,0846	0,1076	0,6614	0,1463	0,295126404	0,334211488	0,949741349	0,392491702
MK1	62	Eskisehir+	0	0,0347	0,0493	0,8947	0,0213	0,187373854	0,223902132	1,240313659	0,146468331
MK2	63	Eskisehir+	0	0,593	0,0987	0,2467	0,0617	0,878942926	0,319577585	0,519779806	0,251022814
ME1	64	Eskisehir+	0	0,0177	0,2171	0,3625	0,4028	0,133436978	0,48469658	0,646103312	0,687575291
ME2	65	Eskisehir+	0	0,0253	0,03	0,7908	0,1539	0,159738192	0,174083011	1,095745254	0,403131689
ME3	66	Eskisehir+	0	0,122	0,034	0,767	0,077	0,356807918	0,185452089	1,067060439	0,281179206
ME4	67	Eskisehir+	0	0,1263	0,0227	0,7807	0,0703	0,363328184	0,151241111	1,083436455	0,268350642
ME5	68	Eskisehir+	0	0,1374	0,023	0,7553	0,0844	0,379735753	0,152244963	1,053339397	0,294766868
ME6	69	Eskisehir+	0	0,013	0,0777	0,5767	0,3327	0,114266037	0,282489354	0,862402206	0,614807797
ME7	70	Eskisehir+	0	0,0307	0,0317	0,9037	0,034	0,176123284	0,178999286	1,255264156	0,185452089
ME8	71	Eskisehir+	0	0,2003	0,0667	0,6473	0,0857	0,464022504	0,261224218	0,934916621	0,297097
MBi1	72	Eskisehir+	0	0,0707	0,019	0,8497	0,0607	0,26913193	0,138280757	1,172677	0,248936829
MA01	73	Ankara	1	0,034	0,0627	0,7996	0,1037	0,185452089	0,253093065	1,106648905	0,327867485
MA02	74	Ankara	1	0,012	0,0267	0,9297	0,0317	0,109764792	0,16413736	1,302445684	0,178999286
MA03	75	Ankara	1	0,1549	0,4197	0,3531	0,0723	0,404515461	0,704748907	0,636298228	0,272236865
MA04	76	Ankara	0	0,01	0,13	0,368	0,492	0,100167421	0,368862984	0,651814667	0,777397822
MA05	77	Ankara	0	0,0203	0,0507	0,8799	0,049	0,142964577	0,227114029	1,216900884	0,223208269
MA06	78	Ankara	1	0,129	0,0833	0,7203	0,0673	0,36737379	0,292782464	1,013531631	0,262424116
MA07	79	Ankara	1	0,0263	0,0633	0,8857	0,0247	0,162892152	0,254327825	1,2259173	0,15781662
MA08	80	Ankara	0	0,1323	0,1097	0,5257	0,2323	0,372269772	0,337585566	0,811109493	0,502907526
MA09	81	Ankara	0	0,01	0,0223	0,9187	0,049	0,100167421	0,149892507	1,281652656	0,223208269
MA10	82	Ankara	1	0,0646	0,0483	0,873	0,014	0,256984564	0,221581375	1,206415765	0,118599433
MA11	83	Ankara	0	0,029	0,2369	0,6871	0,047	0,171127881	0,508335332	0,977165138	0,218530016
MA12	84	Ankara	1	0,033	0,1124	0,8343	0,0203	0,182673281	0,341882348	1,15156042	0,142964577
MA13	85	Ankara	1	0,014	0,0313	0,895	0,0597	0,118599433	0,17785423	1,240802662	0,246834708
MA14	86	Ankara	0	0,0563	0,059	0,0347	0,85	0,239561025	0,2453534	0,187373854	1,173096912
MA15	87	Ankara	1	0,0207	0,07	0,8323	0,077	0,144375996	0,267763327	1,148877342	0,281179206
MA16	88	Ankara	0	0,057	0,4495	0,2144	0,2791	0,241075052	0,734811908	0,481414623	0,556596104
MA17	89	Ankara	0	0,0273	0,2428	0,7026	0,0273	0,165988288	0,515244246	0,993996955	0,165988288
MA18	90	Ankara	0	0,0387	0,047	0,5065	0,4078	0,19801464	0,218530016	0,791898346	0,692667484
MA19	91	Ankara	0	0,0187	0,581	0,352	0,0483	0,137177768	0,866756708	0,635147032	0,221581375
MA20	92	Ankara	0	0,0127	0,0273	0,761	0,199	0,112934187	0,165988288	1,059995208	0,462396434
MA21	93	Ankara	0	0,026	0,0407	0,6687	0,2647	0,161952188	0,203136584	0,957474947	0,540412834
MA22	94	Ankara	0	0,0157	0,0447	0,7212	0,2184	0,125629847	0,213031405	1,014534684	0,486271513
MA23	95	Ankara	0	0,3367	0,042	0,2323	0,389	0,619046131	0,2064014	0,502907526	0,673465575
MA24	96	Ankara	0	0,009	0,4527	0,4893	0,049	0,095011212	0,738027329	0,774697347	0,223208269
MA25	97	Ankara	0	0,075	0,0933	0,7837	0,048	0,277405516	0,310411491	1,087070629	0,220880712
MA26	98	Ankara	0	0,0143	0,0303	0,8654	0,09	0,119869462	0,174960207	1,195144774	0,304692654
MA27	99	Ankara	0	0,0143	0,0257	0,0423	0,9177	0,119869462	0,161006931	0,207147925	1,279828228
WM01	100	Mugla	0	0,0167	0,3261	0,6315	0,0257	0,129590896	0,607786371	0,918463342	0,161006931
WM02	101	Mugla	0	0,0243	0,028	0,844	0,1037	0,15652291	0,168122894	1,164762924	0,327867485
WM03	102	Mugla	0	0,0187	0,2948	0,6252	0,0614	0,137177768	0,573951833	0,911944861	0,250398689
WM04	103	Mugla	0	0,0233	0,0213	0,9117	0,0437	0,153242443	0,146468331	1,269086578	0,210598741
WM05	104	Mugla	0	0,0287	0,0507	0,8523	0,0683	0,17023174	0,227114029	1,17632781	0,264412972
WM06	105	Mugla	0	0,0233	0,0453	0,8864	0,045	0,153242443	0,214478562	1,227018794	0,213756132
WM07	106	Mugla	0	0,0703	0,2937	0,5243	0,1117	0,268350642	0,572744911	0,80970774	0,340772743
WM08	107	Mugla	0	0,0137	0,2023	0,6263	0,1577	0,117315918	0,466516452	0,913081393	0,408370764
WM09	108	Mugla	0	0,0263	0,1512	0,2632	0,5593	0,162892152	0,399376996	0,538711274	0,844838069
WM10	109	Mugla	0	0,1306	0,2456	0,3782	0,2456	0,369754162	0,518503013	0,66236019	0,518503013
WM11	110	Mugla	0	0,0277	0,0183	0,9157	0,0383	0,167211275	0,135693524	1,276209372	0,196975136
WM12	111	Mugla	0	0,1127	0,137	0,7213	0,029	0,342356968	0,379154456	1,014646196	0,171127881
WM13	112	Mugla	0	0,042	0,092	0,4423	0,4237	0,2064014	0,308169645	0,727569323	0,708798887
WM14	113	Mugla	1	0,0756	0,1026	0,6861	0,1356	0,278542421	0,326059189	0,976087262	0,377114269
WM15	114	Mugla	0	0,0766	0,033	0,8527	0,0377	0,280428099	0,182673281	1,17689182	0,195406055
WM16	115	Mugla	0	0,0157	0,107	0,704	0,1733	0,125629847	0,333242164	0,995529345	0,429364605
WM17	116	Mugla	0	0,0093	0,0877	0,6023	0,3007	0,096586613	0,30065078	0,888425686	0,580403249
WM18	117	Mugla	0	0,0127	0,1293	0,7348	0,1233	0,112934187	0,367821062	1,029816994	0,35878942
WM19	118	Mugla	1	0,1007	0,1027	0,7777	0,019	0,322915413	0,326223933	1,079820113	0,138280757
WM20	119	Mugla	1	0,0147	0,0787	0,8856	0,021	0,121542586	0,284351657	1,225760184	0,145425819
WM21	120	Mugla	0	0,016	0,3401	0,6062	0,0377	0,126830868	0,622638966	0,892413337	0,195406055
WM22	121	Mugla	0	0,011	0,1156	0,3162	0,5572	0,105074125	0,346916898	0,597184658	0,84272367
WM23	122	Mugla	0	0,0684	0,2041	0,2865	0,441	0,264611113	0,468753148	0,56481191	0,726260379
WM24	123	Mugla	1	0,17	0,0197	0,1947	0,6157	0,424988783	0,14082166	0,456989162	0,902156411
WM25	124	Mugla	1	0,046	0,2661	0,6389	0,049	0,216155422	0,541998174	0,926149766	0,223208269
WM26	125	Mugla	1	0,0417	0,2633	0,6297	0,0653	0,205652321	0,538824808	0,916598606	0,258404807
WM27	126	Mugla	1	0,058	0,3138	0,5762	0,052	0,243222879	0,594601319	0,861896257	0,230059119
WM28	127	Mugla	1	0,147	0,1487	0,1567	0,5477	0,393481083	0,395875787	0,406997095	0,833170816
WM29	128	Mugla	1	0,0873	0,2383	0,221	0,4533	0,299942981	0,509980021	0,489411293	0,738629997
WM30	129	Mugla	1	0,1117	0,129	0,263	0,4963	0,340772743	0,36737379	0,538484164	0,78169813
WM31	130	Mugla	0	0,0656	0,1396	0,3999	0,3949	0,259011313	0,382920268	0,684617139	0,679508401
WM32	131	Mugla	1	0,1427	0,0573	0,3867	0,4133	0,387372099	0,241721245	0,671105436	0,698257701
WM33	132	Mugla	1	0,113	0,0273	0,1643	0,6954	0,342831038	0,165988288	0,417350028	0,986148438
WM34	133	Mugla	1	0,2907	0,0643	0,1767	0,4683	0,569446558	0,256373697	0,433838724	0,753676888
WM35	134	Mugla	1	0,2143	0,1526	0,3722	0,2609	0,481292781	0,401327274	0,65616403	0,536096144
WM36	135	Mugla	1	0,031	0,022	0,2243	0,7228	0,176990783	0,14887328	0,493377423	1,016320347
NE1	136	Bitlis+	1	0,012	0,28	0,6267	0,0813	0,109764792	0,557598827	0,913494844	0,289143671
NO1	137	Bitlis+	1	0,2783	0,159	0,189	0,3737	0,555703962	0,410151253	0,449750992	0,657714934
NAdh01	138	Ardahan	0	0,0173	0,0187	0,02	0,944	0,131911691	0,137177768	0,141897055	1,331886878
NAdh02	139	Ardahan	0	0,0257	0,0377	0,1083	0,8284	0,161006931	0,195406055	0,335339368	1,143681768
NAdh03	140	Ardahan	0	0,012	0,052	0,0333	0,9026	0,109764792	0,230059119	0,18351114	1,253404492
NAdh04	141	Ardahan	0	0,012	0,0901	0,045	0,8529	0,109764792	0,304867324	0,213756132	1,177174063
NAdh05	142	Ardahan	0	0,0203	0,0393	0,0443	0,896	0,142964577	0,199564279	0,212061485	1,242437144
NAdh06	143	Ardahan	0	0,029	0,049	0,04	0,882	0,171127881	0,223208269	0,201357921	1,220143182
NAdh07	144	Ardahan	0	0,0063	0,0323	0,013	0,9483	0,079456118	0,18070385	0,114266037	1,341413725
NAdh08	145	Ardahan	0	0,029	0,192	0,043	0,736	0,171127881	0,453570772	0,20888004	1,031177168
NAdh09	146	Ardahan	0	0,015	0,0347	0,0643	0,886	0,122782759	0,187373854	0,256373697	1,226389008
NAdh10	147	Ardahan	0	0,0167	0,085	0,056	0,8424	0,129590896	0,295844321	0,238909449	1,16256277
NAdh11	148	Ardahan	0	0,3453	0,0467	0,2163	0,3917	0,62811716	0,217820182	0,483725698	0,676232944
NAdh12	149	Ardahan	0	0,0247	0,0197	0,095	0,8607	0,15781662	0,14082166	0,313322106	1,188309065
NAdh13	150	Ardahan	0	0,018	0,1347	0,0457	0,8016	0,134569866	0,375798031	0,215438266	1,109151732
NAdh14	151	Ardahan	0	0,011	0,2007	0,025	0,7633	0,105074125	0,464522036	0,158780215	1,062696224
NAdh15	152	Ardahan	0	0,0624	0,009	0,0197	0,909	0,252473619	0,095011212	0,14082166	1,264360879
NAdh16	153	Ardahan	0	0,011	0,0377	0,0393	0,912	0,105074125	0,195406055	0,199564279	1,269615655
NAdh17	154	Ardahan	0	0,0127	0,0583	0,0737	0,8553	0,112934187	0,243863832	0,27492779	1,180573466
NAdh18	155	Ardahan	0	0,0323	0,024	0,0783	0,8653	0,18070385	0,155545801	0,283608043	1,194998296
NAdh19	156	Ardahan	0	0,014	0,018	0,0303	0,9377	0,118599433	0,134569866	0,174960207	1,318529499
NAdh20	157	Ardahan	0	0,031	0,0223	0,0333	0,9133	0,176990783	0,149892507	0,18351114	1,271917799
NAdh21	158	Ardahan	0	0,01	0,044	0,05	0,896	0,100167421	0,211331302	0,225513406	1,242437144
NAdh22	159	Ardahan	0	0,0183	0,0347	0,0137	0,9333	0,135693524	0,187373854	0,117315918	1,309572108
NAdh23	160	Ardahan	0	0,018	0,049	0,0633	0,8697	0,134569866	0,223208269	0,254327825	1,201487535
NAdh24	161	Ardahan	0	0,0103	0,0123	0,0177	0,9597	0,101663951	0,111133989	0,133436978	1,368674311
NAdh25	162	Ardahan	0	0,0966	0,0257	0,1386	0,7391	0,316040288	0,161006931	0,381475392	1,034700182
NAdh26	163	Ardahan	0	0,0123	0,1417	0,1747	0,6713	0,111133989	0,385940478	0,431211041	0,960239659
NAdh27	164	Ardahan	0	0,0093	0,183	0,082	0,7257	0,096586613	0,442040799	0,290421836	1,019564993
NAdh28	165	Ardahan	0	0,008	0,0447	0,0243	0,923	0,089562407	0,213031405	0,15652291	1,289617121
NAdh29	166	Ardahan	0	0,0127	0,0626	0,4995	0,4252	0,112934187	0,252886737	0,784898163	0,71031631
NAdh30	167	Ardahan	0	0,0107	0,1573	0,077	0,755	0,103626168	0,407821723	0,281179206	1,052990559
NAdh31	168	Ardahan	0	0,0163	0,0263	0,054	0,9034	0,128020863	0,162892152	0,234522929	1,254756039
NAdh32	169	Ardahan	0	0,046	0,03	0,0253	0,8986	0,216155422	0,174083011	0,159738192	1,246719645
NAtv01	170	Artvin	0	0,02	0,406	0,03	0,544	0,141897055	0,690835444	0,174083011	0,829455152
NAtv02	171	Artvin	0	0,0107	0,0407	0,0393	0,9093	0,103626168	0,203136584	0,199564279	1,264882808
NAtv03	172	Artvin	0	0,01	0,3155	0,0883	0,5863	0,100167421	0,596431733	0,301709749	0,872132502
NAtv04	173	Artvin	0	0,0137	0,0323	0,044	0,91	0,117315918	0,18070385	0,211331302	1,266103673
NAtv05	174	Artvin	0	0,0233	0,0987	0,024	0,854	0,153242443	0,319577585	0,155545801	1,178729246
NAtv06	175	Artvin	0	0,008	0,0143	0,0207	0,957	0,089562407	0,119869462	0,144375996	1,361916287
NAtv07	176	Artvin	0	0,0223	0,038	0,0696	0,87	0,149892507	0,196192083	0,266978427	1,201933343
NAtv08	177	Artvin	0	0,0363	0,239	0,0583	0,6663	0,191697515	0,510801119	0,243863832	0,954927763
NAtv09	178	Artvin	0	0,018	0,2053	0,161	0,6157	0,134569866	0,470240204	0,412878989	0,902156411
NAtv10	179	Artvin	0	0,008	0,0213	0,0217	0,949	0,089562407	0,146468331	0,147847238	1,342999521
EB01	180	Bitlis+	1	0,0113	0,5053	0,209	0,2743	0,106502684	0,790698263	0,47480517	0,551231334
EB02	181	Bitlis+	1	0,116	0,0903	0,7601	0,0337	0,347541927	0,305216404	1,05894072	0,184622638
EB03	182	Bitlis+	1	0,022	0,3446	0,4285	0,2049	0,14887328	0,627380863	0,713652209	0,469744878
EB04	183	Bitlis+	1	0,0327	0,5093	0,1835	0,2745	0,181831735	0,7946987	0,442687008	0,551455443
EB05	184	Bitlis+	1	0,032	0,7268	0,1506	0,0906	0,1798535	1,020798503	0,398538893	0,30573937
EB06	185	Bitlis+	1	0,0173	0,1317	0,4117	0,4393	0,131911691	0,371383485	0,696632623	0,724548067
EB07	186	Bitlis+	1	0,0317	0,4945	0,4542	0,0197	0,178999286	0,779898052	0,739533872	0,14082166
EB08	187	Bitlis+	1	0,01	0,1373	0,5263	0,3263	0,100167421	0,379590496	0,811710306	0,607999672
EB09	188	Bitlis+	1	0,02	0,6027	0,1772	0,2001	0,141897055	0,888834366	0,434493815	0,463772597
EB10	189	Bitlis+	1	0,3089	0,4615	0,1829	0,0467	0,589310226	0,746860017	0,441911474	0,217820182
EB11	190	Bitlis+	1	0,0203	0,5395	0,0917	0,3484	0,142964577	0,824939366	0,307650279	0,631373692
EB12	191	Bitlis+	1	0,1523	0,0727	0,7003	0,0747	0,400909978	0,273008132	0,99148396	0,276835497
EB13	192	Bitlis+	1	0,0187	0,3212	0,6278	0,0323	0,137177768	0,60254982	0,914632297	0,18070385
EB14	193	Bitlis+	1	0,0327	0,1464	0,0297	0,7913	0,181831735	0,392633162	0,173201554	1,096360172
EB15	194	Bitlis+	1	0,0547	0,6779	0,065	0,2024	0,23606678	0,967283135	0,257797003	0,466640907
EB16	195	Bitlis+	1	0,1706	0,2256	0,3895	0,2143	0,425786876	0,494934126	0,673978311	0,481292781
EB17	196	Bitlis+	1	0,011	0,0853	0,431	0,4727	0,105074125	0,296381754	0,716177259	0,758084581
EB18	197	Bitlis+	1	0,0133	0,8863	0,042	0,0584	0,115582807	1,226861257	0,2064014	0,244077139
EB19	198	Bitlis+	1	0,0167	0,0993	0,4663	0,4177	0,129590896	0,320582066	0,751672596	0,70272193
EB20	199	Bitlis+	1	0,3819	0,5185	0,0866	0,013	0,6661715	0,803902387	0,298700795	0,114266037
EB21	200	Bitlis+	1	0,0107	0,3308	0,6165	0,042	0,103626168	0,612790132	0,902978891	0,2064014
EB22	201	Bitlis+	1	0,042	0,17	0,6329	0,155	0,2064014	0,424988783	0,919915003	0,404653637
EB23	202	Bitlis+	1	0,025	0,0994	0,7726	0,103	0,158780215	0,320749217	1,073712	0,326717739
EB24	203	Bitlis+	1	0,008	0,8457	0,0993	0,047	0,089562407	1,167110689	0,320582066	0,218530016
EB25	204	Bitlis+	1	0,0373	0,3207	0,2357	0,4063	0,194353329	0,602014306	0,50692293	0,691140873
EB26	205	Bitlis+	1	0,0233	0,1564	0,3364	0,4838	0,153242443	0,406584299	0,618728691	0,769195328
EB27	206	Bitlis+	1	0,016	0,3937	0,1873	0,403	0,126830868	0,678280653	0,447576139	0,687779173
EB28	207	Bitlis+	1	0,0337	0,0986	0,6468	0,2209	0,184622638	0,319409908	0,934393485	0,489290778
EB29	208	Bitlis+	1	0,0223	0,8083	0,1404	0,029	0,149892507	1,117606501	0,38407305	0,171127881
EB30	209	Bitlis+	1	0,008	0,7067	0,1817	0,1037	0,089562407	0,998490623	0,440357437	0,327867485
EB31	210	Bitlis+	1	0,0177	0,5817	0,2057	0,195	0,133436978	0,867466161	0,470735172	0,457367868
EE1	211	Bitlis+	1	0,0137	0,1851	0,7673	0,034	0,117315918	0,444750311	1,067415345	0,185452089
EE2	212	Bitlis+	1	0,0516	0,03	0,0676	0,8507	0,229156684	0,174083011	0,263022203	1,174078052
EE3	213	Bitlis+	1	0,0237	0,8714	0,0766	0,0283	0,154562716	1,204019591	0,280428099	0,169029783
EE4	214	Bitlis+	1	0,0177	0,0403	0,6527	0,2893	0,133436978	0,202122016	0,940577398	0,567903898
SH01	215	Hatay	1	0,0413	0,0253	0,6116	0,3218	0,204649528	0,159738192	0,897946193	0,603192146
SH02	216	Hatay	1	0,0267	0,165	0,6303	0,178	0,16413736	0,41829377	0,917219976	0,435540455
SH03	217	Hatay	0	0,01	0,8384	0,0207	0,131	0,100167421	1,157101693	0,144375996	0,370347315
SH04	218	Hatay	0	0,0297	0,9097	0,0297	0,031	0,173201554	1,265579923	0,173201554	0,176990783
SH05	219	Hatay	0	0,013	0,9226	0,0353	0,029	0,114266037	1,2888678	0,189006257	0,171127881
SH06	220	Hatay	0	0,0467	0,3151	0,5979	0,0403	0,217820182	0,596001287	0,883934751	0,202122016
SH07	221	Hatay	0	0,0073	0,948	0,0213	0,0233	0,085544332	1,340737208	0,146468331	0,153242443
SH08	222	Hatay	0	0,0083	0,9647	0,017	0,01	0,091230837	1,38179007	0,130756325	0,100167421
SH09	223	Hatay	0	0,007	0,9207	0,0626	0,0097	0,083763922	1,28533248	0,252886737	0,0986485
SH10	224	Hatay	1	0,0147	0,9293	0,041	0,015	0,121542586	1,301664396	0,203894381	0,122782759
SH11	225	Hatay	1	0,046	0,3386	0,5445	0,071	0,216155422	0,621054978	0,829957121	0,269716557
SH12	226	Hatay	0	0,0233	0,8187	0,0737	0,0843	0,153242443	1,130957788	0,27492779	0,294586955
SH13	227	Hatay	1	0,924	0,043	0,02	0,013	1,291498269	0,20888004	0,141897055	0,114266037
SH14	228	Hatay	0	0,014	0,955	0,013	0,018	0,118599433	1,357040194	0,114266037	0,134569866
SH15	229	Hatay	0	0,0153	0,8073	0,0764	0,101	0,124010778	1,116337559	0,280051871	0,323413537
SH16	230	Hatay	0	0,0213	0,901	0,051	0,0267	0,146468331	1,250716162	0,227796806	0,16413736
SH17	231	Hatay	0	0,008	0,8684	0,036	0,0876	0,089562407	1,199560723	0,190893927	0,300473967
SH18	232	Hatay	1	0,013	0,6973	0,2367	0,053	0,114266037	0,988214406	0,508100103	0,232300963
SH19	233	Hatay	1	0,172	0,2637	0,0973	0,467	0,427644772	0,539278805	0,317223163	0,752374158
SH20	234	Hatay	1	0,0227	0,8944	0,0673	0,0157	0,151241111	1,23982527	0,262424116	0,125629847
SH21	235	Hatay	0	0,0293	0,8746	0,0487	0,0473	0,172019537	1,208824874	0,222512388	0,219237699
SH22	236	Hatay	0	0,009	0,9217	0,0427	0,0267	0,095011212	1,287188284	0,208139367	0,16413736
SH23	237	Hatay	1	0,0486	0,3509	0,3775	0,2229	0,222279976	0,633995014	0,661638317	0,491697382
SH24	238	Hatay	1	0,017	0,1843	0,7021	0,0966	0,130756325	0,443719526	0,993450178	0,316040288
SH25	239	Hatay	1	0,1624	0,5899	0,138	0,1097	0,414780261	0,87578973	0,380606367	0,337585566
SH26	240	Hatay	1	0,0787	0,0563	0,055	0,81	0,284351657	0,239561025	0,236725579	1,119769515
SH27	241	Hatay	0	0,0113	0,7743	0,1193	0,095	0,106502684	1,075742586	0,352663195	0,313322106
SH28	242	Hatay	1	0,0707	0,6649	0,2454	0,019	0,26913193	0,953444021	0,518270662	0,138280757
SH29	243	Hatay	0	0,0153	0,5547	0,1077	0,3222	0,124010778	0,840207867	0,334372811	0,603620189
SH30	244	Hatay	0	0,011	0,8696	0,0467	0,0727	0,105074125	1,20133903	0,217820182	0,273008132
SH31	245	Hatay	0	0,0303	0,8573	0,0603	0,052	0,174960207	1,183424228	0,24809794	0,230059119
SH32	246	Hatay	0	0,0293	0,913	0,0183	0,0393	0,172019537	1,271385157	0,135693524	0,199564279
SH33	247	Hatay	0	0,012	0,9604	0,017	0,0107	0,109764792	1,370461484	0,130756325	0,103626168
SH34	248	Hatay	0	0,0117	0,8593	0,0403	0,0887	0,108378581	1,186291692	0,202122016	0,302413923
SH35	249	Hatay	0	0,0077	0,9354	0,0167	0,0403	0,087862648	1,313811763	0,129590896	0,202122016
SH36	250	Hatay	0	0,009	0,9537	0,0163	0,021	0,095011212	1,353925971	0,128020863	0,145425819
